# Supplementary material for: Single amino acid utilization for bacterial categorization
Source: PubMed Central journal article supplement (PMC7391690; doi:10.1038/s41598-020-69686-5), 2020-07-29
Supplement: 41598_2020_69686_MOESM1_ESM.pdf [file 41598_2020_69686_MOESM1_ESM.pdf]

## **Supplementary Information:**

### **Single amino acid utilization for bacterial categorization**

Yi-Kai Liu, Hung-Chih Kuo, Chih-Ho Lai, Chi-Chung Chou

(a)

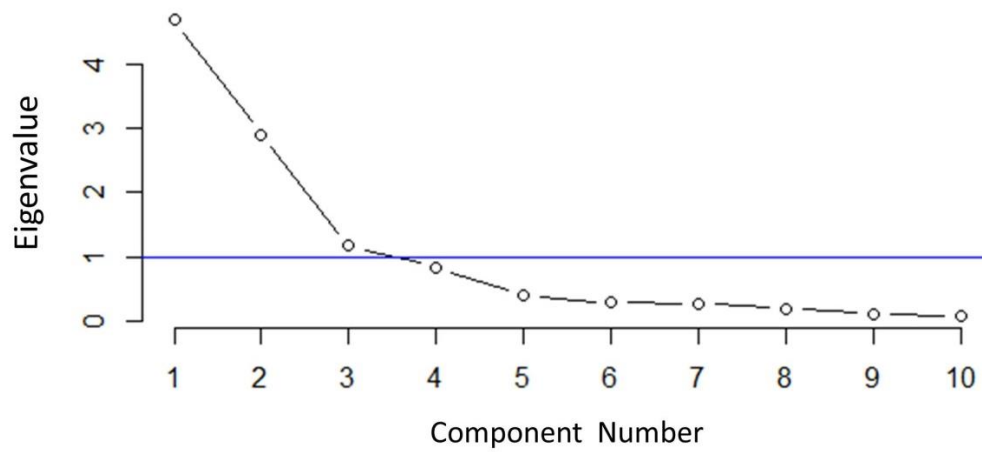

(b)

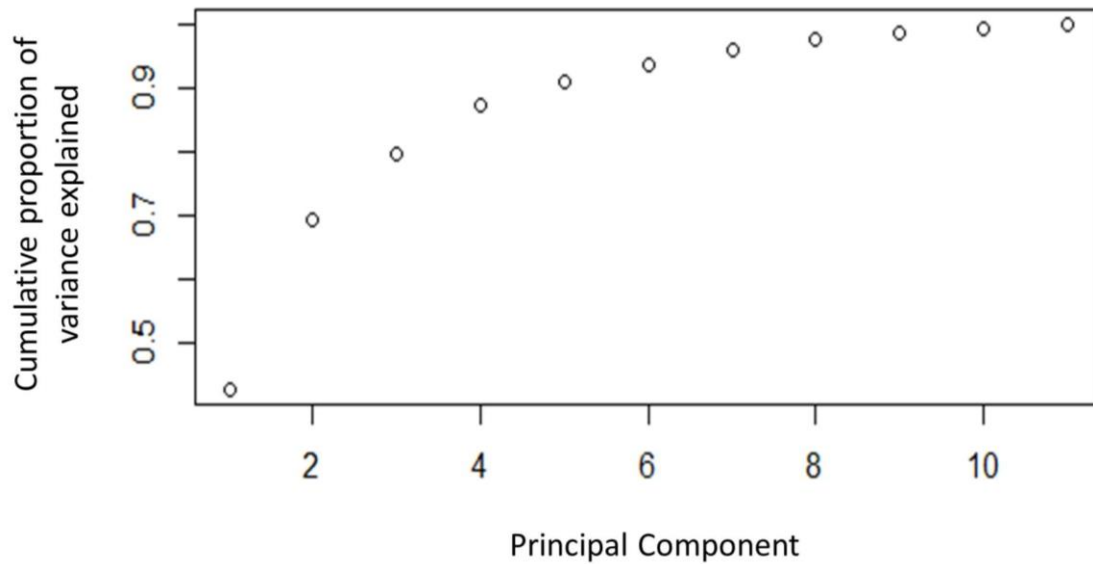

**Supplementary Figure 1. Evaluation of PCA.** (a) The scree plot graphs the eigenvalue against the component number. A component that displays an eigenvalue greater than 1 accounts for a greater amount of variance than had been contributed by one variable, and therefore accounts for a meaningful amount of variance. (b) Cumulative proportion of variance explained with PCA. Together the first three components (PC1-3) account for 80% of variance.

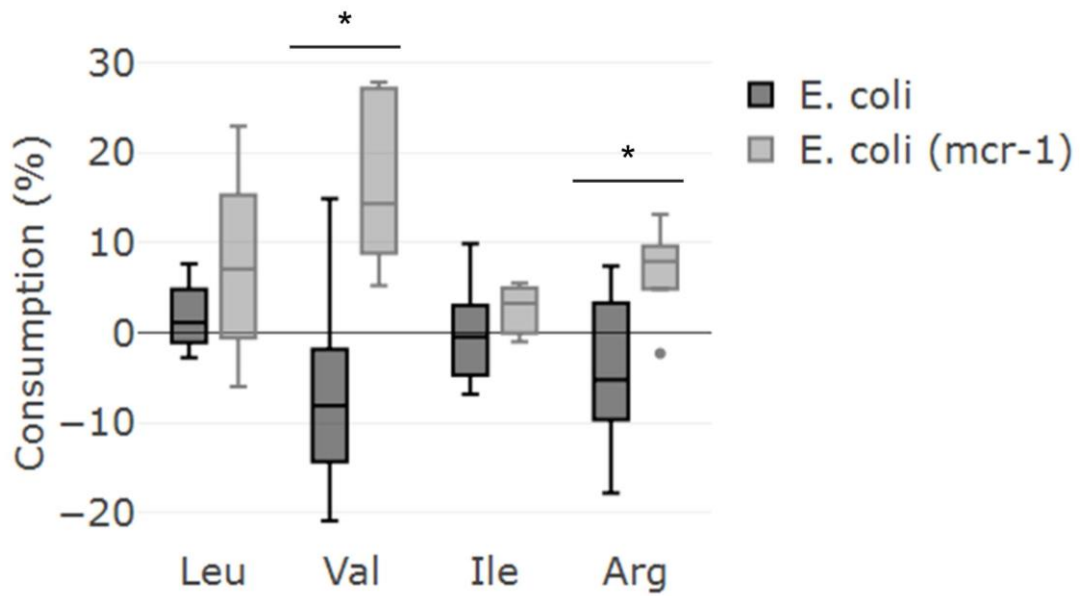

**Supplementary Figure 2. Comparative consumption of AAs between *E. coli* strains with and without *mcr-1* gene.** Median [IQR] of consumption of Leu, Val, Ile, and Arg were 1% [-1 to 5], -8% [-14 to -2], 0% [-5 to 3], and -5% [-10 to 3] respectively in strains without *mcr-1* gene, while they were 7% [-1 to 15], 14% [9 to 27], 3% [0 to 5], and 8% [5 to 10] respectively in strains with *mcr-1* gene. The consumption of Val and Arg were significantly different ( $P < 0.05$ ) between two groups.

(a)

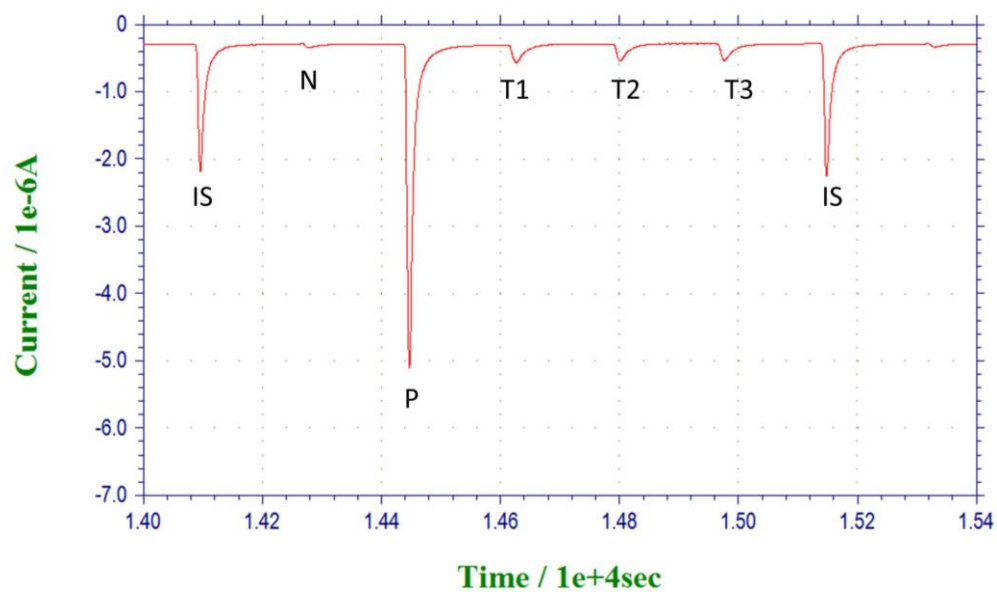

(b)

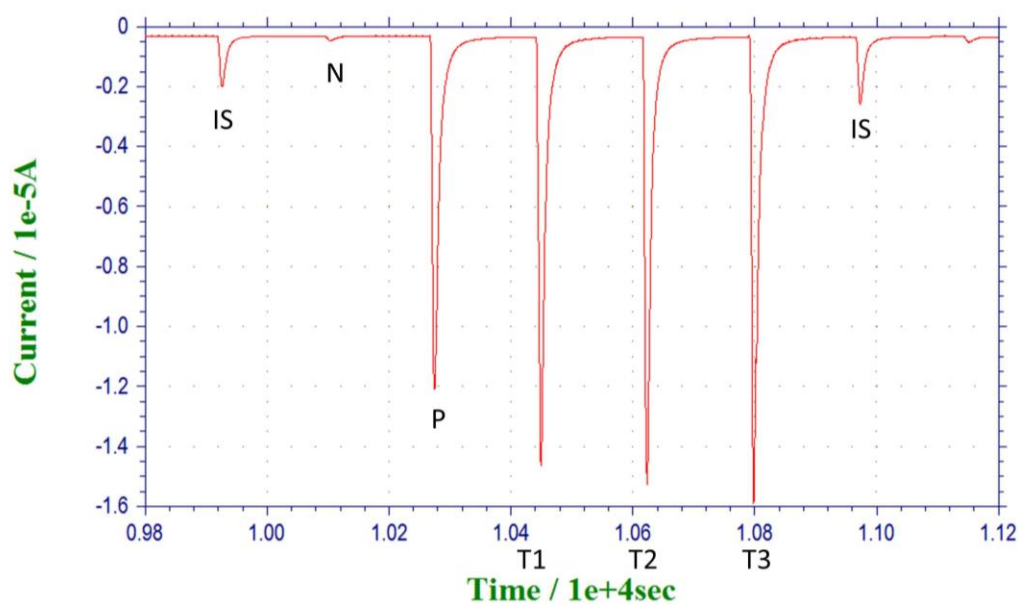

**Supplementary Figure 3. Chronoamperometric signals in amino acid detection.**

IS, N, and P are the electrochemical current value of the internal standard, the negative control, and positive control respectively. T1, T2, and T3 are the current values of triplicated samples. (a) The detection of high consumption of AA. (b) The detection of negative consumption of AA.

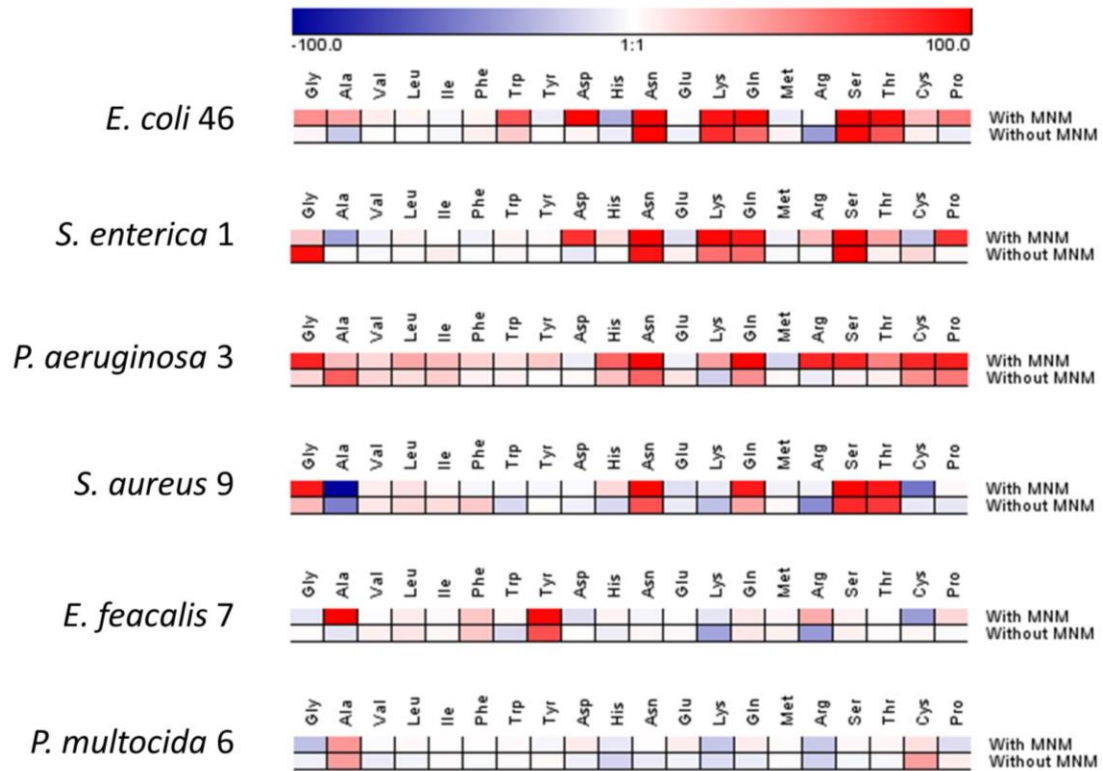

**Supplementary Figure 4. The effect of MNM on the determination of AA consumption.** Strains from six bacterial species were selected to evaluate the influence of MNM. Each strain was cultivated in 20 AAs medium with and without MNM, and then the consumption level of AA was determined after cultivation. The color gradients, which goes from white to red and white to blue, represent the level of positive consumption (0 to 100%) and negative consumption (0 to -100%) of AAs, respectively.

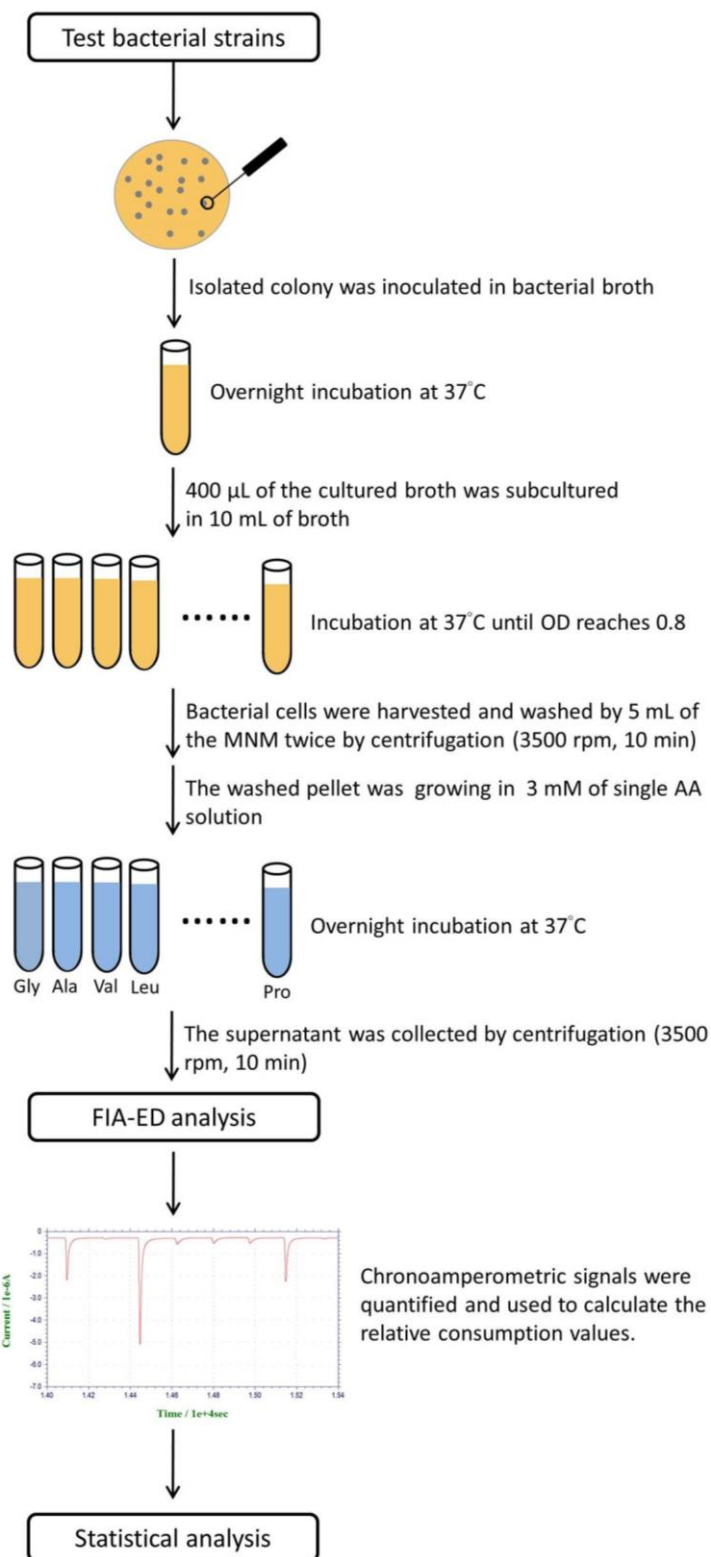

Supplementary Figure 5. Schematic diagram of the experimental procedure.

|        | <b>Bacterial strains</b> | <b>Source</b>             | <b>Note</b> |
|--------|--------------------------|---------------------------|-------------|
| No. 1  | <i>Escherichia coli</i>  | Pig, intestine            |             |
| No. 2  | <i>Escherichia coli</i>  | Pig, intestine            |             |
| No. 3  | <i>Escherichia coli</i>  | Pig, intestine            |             |
| No. 4  | <i>Escherichia coli</i>  | Pig, intestine            |             |
| No. 5  | <i>Escherichia coli</i>  | Pig, intestine            |             |
| No. 6  | <i>Escherichia coli</i>  | Pig, intestine            |             |
| No. 7  | <i>Escherichia coli</i>  | Pig, intestine            |             |
| No. 8  | <i>Escherichia coli</i>  | Pig, intestine            |             |
| No. 9  | <i>Escherichia coli</i>  | Pig, intestine            |             |
| No. 10 | <i>Escherichia coli</i>  | Pig, intestine            |             |
| No. 11 | <i>Escherichia coli</i>  | Chicken, uterine tube     |             |
| No. 12 | <i>Escherichia coli</i>  | Chicken, lung             |             |
| No. 13 | <i>Escherichia coli</i>  | Chicken, liver            |             |
| No. 14 | <i>Escherichia coli</i>  | Chicken, nasal mucus      |             |
| No. 15 | <i>Escherichia coli</i>  | Chicken, intestine        |             |
| No. 16 | <i>Escherichia coli</i>  | Chicken, intestine        |             |
| No. 17 | <i>Escherichia coli</i>  | Cat                       |             |
| No. 18 | <i>Escherichia coli</i>  | Cat                       |             |
| No. 19 | <i>Escherichia coli</i>  | Cat                       |             |
| No. 20 | <i>Escherichia coli</i>  | Cat                       |             |
| No. 21 | <i>Escherichia coli</i>  | Cat                       |             |
| No. 22 | <i>Escherichia coli</i>  | Dog                       |             |
| No. 23 | <i>Escherichia coli</i>  | Dog                       |             |
| No. 24 | <i>Escherichia coli</i>  | Dog                       |             |
| No. 25 | <i>Escherichia coli</i>  | Dog                       |             |
| No. 26 | <i>Escherichia coli</i>  | Dog                       |             |
| No. 27 | <i>Escherichia coli</i>  | Goose, joint              |             |
| No. 28 | <i>Escherichia coli</i>  | Goose, lung               |             |
| No. 29 | <i>Escherichia coli</i>  | Goose, bursa of Fabricius |             |
| No. 30 | <i>Escherichia coli</i>  | Goose, liver              |             |
| No. 31 | <i>Escherichia coli</i>  | Goose, lung               |             |
| No. 32 | <i>Escherichia coli</i>  | Pigeon, lung              |             |
| No. 33 | <i>Escherichia coli</i>  | Turkey, lung              |             |
| No. 34 | <i>Escherichia coli</i>  | Chicken, intestine        |             |
| No. 35 | <i>Escherichia coli</i>  | Chicken, intestine        |             |
| No. 36 | <i>Escherichia coli</i>  | Chicken, intestine        |             |
| No. 37 | <i>Escherichia coli</i>  | Chicken, intestine        |             |

|        |                              |                    |                    |
|--------|------------------------------|--------------------|--------------------|
| No. 38 | <i>Escherichia coli</i>      | Chicken, intestine |                    |
| No. 39 | <i>Escherichia coli</i>      | Chicken, intestine |                    |
| No. 40 | <i>Escherichia coli</i>      | Chicken, air sac   |                    |
| No. 41 | <i>Escherichia coli</i>      | Chicken, intestine |                    |
| No. 42 | <i>Escherichia coli</i>      | Chicken, heart     |                    |
| No. 43 | <i>Escherichia coli</i>      | Chicken, lung      |                    |
| No. 44 | <i>Escherichia coli</i>      | Chicken, liver     |                    |
| No. 45 | <i>Escherichia coli</i>      | Chicken, lung      |                    |
| No. 46 | <i>Escherichia coli</i>      |                    | ATCC 25922         |
| No. 47 | <i>Escherichia coli</i>      |                    | ATCC 35150         |
| No. 48 | <i>Escherichia coli</i>      |                    | colistin resistant |
| No. 49 | <i>Escherichia coli</i>      |                    | colistin resistant |
| No. 50 | <i>Escherichia coli</i>      |                    | colistin resistant |
| No. 51 | <i>Escherichia coli</i>      |                    | colistin resistant |
| No. 52 | <i>Escherichia coli</i>      |                    | colistin resistant |
| No. 1  | <i>Pasteurella multocida</i> | Pig, lung          | Type D             |
| No. 2  | <i>Pasteurella multocida</i> | Pig, lung          | Type D             |
| No. 3  | <i>Pasteurella multocida</i> | Pig, lung          | Type D             |
| No. 4  | <i>Pasteurella multocida</i> | Pig, lung          | Type D             |
| No. 5  | <i>Pasteurella multocida</i> | Pig, lung          | Type D             |
| No. 6  | <i>Pasteurella multocida</i> | Pig, lung          | Type D             |
| No. 7  | <i>Pasteurella multocida</i> | Pig, lung          | Type D             |
| No. 8  | <i>Pasteurella multocida</i> | Pig, lung          | Type D             |
| No. 9  | <i>Pasteurella multocida</i> | Pig, lung          | Type D             |
| No. 10 | <i>Pasteurella multocida</i> | Pig, lung          | Type D             |
| No. 11 | <i>Pasteurella multocida</i> | Pig, joint         | Type D             |
| No. 12 | <i>Pasteurella multocida</i> | Pig, lung          | Type D             |
| No. 13 | <i>Pasteurella multocida</i> | Pig, lung          | Type D             |
| No. 14 | <i>Pasteurella multocida</i> | Pig, lung          | Type A             |
| No. 15 | <i>Pasteurella multocida</i> | Pig, lung          | Type A             |
| No. 16 | <i>Pasteurella multocida</i> | Pig, lung          | Type A             |
| No. 17 | <i>Pasteurella multocida</i> | Pig, lung          | Type A             |
| No. 18 | <i>Pasteurella multocida</i> | Pig, lung          | Type A             |
| No. 19 | <i>Pasteurella multocida</i> | Pig, lung          | Type A             |
| No. 20 | <i>Pasteurella multocida</i> | Pig, lung          | Type A             |
| No. 21 | <i>Pasteurella multocida</i> | Pig, lung          | Type A             |
| No. 1  | <i>Salmonella enterica</i>   | Chicken, liver     |                    |
| No. 2  | <i>Salmonella enterica</i>   | Chicken, liver     |                    |



|        |                               |                     |                |
|--------|-------------------------------|---------------------|----------------|
| No. 3  | <i>Salmonella enterica</i>    | Chicken, liver      |                |
| No. 4  | <i>Salmonella enterica</i>    | Chicken, liver      |                |
| No. 5  | <i>Salmonella enterica</i>    | Chicken, liver      |                |
| No. 6  | <i>Salmonella enterica</i>    | Chicken, liver      |                |
| No. 7  | <i>Salmonella enterica</i>    | Chicken, liver      |                |
| No. 8  | <i>Salmonella enterica</i>    | Chicken, liver      |                |
| No. 9  | <i>Salmonella enterica</i>    | Chicken, liver      |                |
| No. 10 | <i>Salmonella enterica</i>    | Chicken, liver      |                |
| No. 11 | <i>Salmonella enterica</i>    | Chicken, liver      |                |
| No. 12 | <i>Salmonella enterica</i>    | Chicken, liver      |                |
| No. 13 | <i>Salmonella enterica</i>    | Chicken, liver      |                |
| No. 14 | <i>Salmonella enterica</i>    | Chicken, liver      | Schwarzengrund |
| No. 15 | <i>Salmonella enterica</i>    | Turkey, diet        | Schwarzengrund |
| No. 16 | <i>Salmonella enterica</i>    | Turkey, feces       | Albany         |
| No. 17 | <i>Salmonella enterica</i>    | Turkey, diet        | Schwarzengrund |
| No. 18 | <i>Salmonella enterica</i>    | Turkey, feces       | Schwarzengrund |
| No. 19 | <i>Salmonella enterica</i>    | Goose, spleen       | Typhimurium    |
| No. 20 | <i>Salmonella enterica</i>    | Goose, pool         | Albany         |
| No. 21 | <i>Salmonella enterica</i>    | Pig, liver          | Hadar          |
| No. 22 | <i>Salmonella enterica</i>    | Pig, liver          | Typhimurium    |
| No. 23 | <i>Salmonella enterica</i>    | Pig, liver          | Typhimurium    |
| No. 24 | <i>Salmonella enterica</i>    | Pig, liver          | Typhimurium    |
| No. 25 | <i>Salmonella enterica</i>    | Pig, liver          | Typhimurium    |
| No. 26 | <i>Salmonella enterica</i>    | Duck, feces         | Typhimurium    |
| No. 27 | <i>Salmonella enterica</i>    | Sparrow, liver      | Albany         |
| <hr/>  |                               |                     |                |
| No. 1  | <i>Pseudomonas aeruginosa</i> | Dog, synovial fluid |                |
| No. 2  | <i>Pseudomonas aeruginosa</i> | Dog, urine          |                |
| No. 3  | <i>Pseudomonas aeruginosa</i> | Dog, pus            |                |
| No. 4  | <i>Pseudomonas aeruginosa</i> | Dog, pus            |                |
| No. 5  | <i>Pseudomonas aeruginosa</i> | Dog, urine          |                |
| No. 6  | <i>Pseudomonas aeruginosa</i> | Dog, bile           |                |
| No. 7  | <i>Pseudomonas aeruginosa</i> | Dog, ear            |                |
| No. 8  | <i>Pseudomonas aeruginosa</i> | Pig, liver          |                |
| No. 9  | <i>Pseudomonas aeruginosa</i> | Pig, intestine      |                |
| No. 10 | <i>Pseudomonas aeruginosa</i> | Pig, liver          |                |
| No. 11 | <i>Pseudomonas aeruginosa</i> | Pig, kidney         |                |
| No. 12 | <i>Pseudomonas aeruginosa</i> | Pig, lung           |                |
| No. 13 | <i>Pseudomonas aeruginosa</i> | Goose, liver        |                |

|        |                               |                  |
|--------|-------------------------------|------------------|
| No. 14 | <i>Pseudomonas aeruginosa</i> | Goose, liver     |
| No. 15 | <i>Pseudomonas aeruginosa</i> | Goose, brain     |
| No. 16 | <i>Pseudomonas aeruginosa</i> | Goose, liver     |
| No. 17 | <i>Pseudomonas aeruginosa</i> | Goose, lung      |
| No. 18 | <i>Pseudomonas aeruginosa</i> | Rabbit, pus      |
| No. 19 | <i>Pseudomonas aeruginosa</i> | Rabbit, pus      |
| No. 20 | <i>Pseudomonas aeruginosa</i> | Rabbit           |
| No. 21 | <i>Pseudomonas aeruginosa</i> | Sheep, breast    |
| No. 22 | <i>Pseudomonas aeruginosa</i> | Sheep, breast    |
| No. 23 | <i>Pseudomonas aeruginosa</i> | Chicken, air sac |
| No. 24 | <i>Pseudomonas aeruginosa</i> | Chicken, lung    |
| No. 25 | <i>Pseudomonas aeruginosa</i> | Duck, egg        |
| No. 26 | <i>Pseudomonas aeruginosa</i> | Turtle, pus      |
| No. 27 | <i>Pseudomonas aeruginosa</i> | Plant            |
| No. 28 | <i>Pseudomonas aeruginosa</i> | Plant            |

---

|        |                               |                  |
|--------|-------------------------------|------------------|
| No. 1  | <i>Sataphylococcus aureus</i> | Chicken, joint   |
| No. 2  | <i>Sataphylococcus aureus</i> | Chicken, joint   |
| No. 3  | <i>Sataphylococcus aureus</i> | Chicken, liver   |
| No. 4  | <i>Sataphylococcus aureus</i> | Chicken, joint   |
| No. 5  | <i>Sataphylococcus aureus</i> | Chicken, liver   |
| No. 6  | <i>Sataphylococcus aureus</i> | Chicken, air sac |
| No. 7  | <i>Sataphylococcus aureus</i> | Chicken, liver   |
| No. 8  | <i>Sataphylococcus aureus</i> | Chicken, lung    |
| No. 9  | <i>Sataphylococcus aureus</i> | Chicken, joint   |
| No. 10 | <i>Sataphylococcus aureus</i> | Chicken, joint   |
| No. 11 | <i>Sataphylococcus aureus</i> | Chicken, joint   |
| No. 12 | <i>Sataphylococcus aureus</i> | Chicken, liver   |
| No. 13 | <i>Sataphylococcus aureus</i> | Chicken, joint   |
| No. 14 | <i>Sataphylococcus aureus</i> | Chicken, liver   |
| No. 15 | <i>Sataphylococcus aureus</i> | Chicken, joint   |
| No. 16 | <i>Sataphylococcus aureus</i> | Chicken, air sac |
| No. 17 | <i>Sataphylococcus aureus</i> | Chicken, joint   |
| No. 18 | <i>Sataphylococcus aureus</i> | Chicken, heart   |
| No. 19 | <i>Sataphylococcus aureus</i> | Chicken, joint   |
| No. 20 | <i>Sataphylococcus aureus</i> | Pig, lung        |
| No. 21 | <i>Sataphylococcus aureus</i> | Cattle, milk     |
| No. 22 | <i>Sataphylococcus aureus</i> | Cattle, milk     |
| No. 23 | <i>Sataphylococcus aureus</i> | Cattle, milk     |

|        |                               |                 |      |
|--------|-------------------------------|-----------------|------|
| No. 24 | <i>Sataphylococcus aureus</i> | Cattle, milk    |      |
| No. 25 | <i>Sataphylococcus aureus</i> | Cattle, milk    |      |
| No. 26 | <i>Sataphylococcus aureus</i> |                 |      |
| No. 27 | <i>Sataphylococcus aureus</i> | Chicken, muscle | MRSA |
| No. 28 | <i>Sataphylococcus aureus</i> | Chicken, muscle | MRSA |
| No. 29 | <i>Sataphylococcus aureus</i> | Chicken, muscle | MRSA |
| No. 30 | <i>Sataphylococcus aureus</i> | Chicken, muscle | MRSA |
| No. 31 | <i>Sataphylococcus aureus</i> | Chicken, muscle | MRSA |
| No. 32 | <i>Sataphylococcus aureus</i> | Chicken, muscle | MRSA |
| No. 33 | <i>Sataphylococcus aureus</i> | Chicken, muscle | MRSA |
| No. 34 | <i>Sataphylococcus aureus</i> | Chicken, muscle | MRSA |
| No. 35 | <i>Sataphylococcus aureus</i> | Chicken, muscle | MRSA |
| No. 36 | <i>Sataphylococcus aureus</i> | Chicken, muscle | MRSA |
| No. 37 | <i>Sataphylococcus aureus</i> | Human           |      |
| No. 38 | <i>Sataphylococcus aureus</i> | Human           |      |
| No. 39 | <i>Sataphylococcus aureus</i> | Human           |      |
| No. 40 | <i>Sataphylococcus aureus</i> | Human           |      |
| No. 41 | <i>Sataphylococcus aureus</i> | Human           |      |
| No. 42 | <i>Sataphylococcus aureus</i> | Human           | MRSA |
| No. 43 | <i>Sataphylococcus aureus</i> | Human           | MRSA |
| No. 44 | <i>Sataphylococcus aureus</i> | Human           | MRSA |
| No. 45 | <i>Sataphylococcus aureus</i> | Human           | MRSA |
| <hr/>  |                               |                 |      |
| No. 1  | <i>Enterococcus faecalis</i>  | Duck, trachea   |      |
| No. 2  | <i>Enterococcus faecalis</i>  | Duck, trachea   |      |
| No. 3  | <i>Enterococcus faecalis</i>  | Duck, trachea   |      |
| No. 4  | <i>Enterococcus faecalis</i>  | Duck, lung      |      |
| No. 5  | <i>Enterococcus faecalis</i>  | Duck, lung      |      |
| No. 6  | <i>Enterococcus faecalis</i>  | Duck, lung      |      |
| No. 7  | <i>Enterococcus faecalis</i>  | Duck, trachea   |      |
| No. 8  | <i>Enterococcus faecalis</i>  | Chicken, feces  |      |
| No. 9  | <i>Enterococcus faecalis</i>  | Chicken, feces  |      |
| No. 10 | <i>Enterococcus faecalis</i>  | Chicken, feces  |      |
| No. 11 | <i>Enterococcus faecalis</i>  | Chicken, feces  |      |
| No. 12 | <i>Enterococcus faecalis</i>  | Goose, feces    |      |
| No. 13 | <i>Enterococcus faecalis</i>  | Goose, feces    |      |
| No. 14 | <i>Enterococcus faecalis</i>  | Goose, feces    |      |
| No. 15 | <i>Enterococcus faecalis</i>  | Goose, feces    |      |
| No. 16 | <i>Enterococcus faecalis</i>  | Bird, feces     |      |

|        |                              |             |
|--------|------------------------------|-------------|
| No. 17 | <i>Enterococcus faecalis</i> | Bird, feces |
| No. 18 | <i>Enterococcus faecalis</i> | Bird, feces |
| No. 19 | <i>Enterococcus faecalis</i> | Bird, feces |
| No. 20 | <i>Enterococcus faecalis</i> | Bird, feces |
| No. 21 | <i>Enterococcus faecalis</i> | Bird, feces |
| <hr/>  |                              |             |
| No. 1  | <i>Staphylococcus hyicus</i> | Pig, joint  |
| No. 2  | <i>Staphylococcus hyicus</i> | Pig, joint  |
| No. 3  | <i>Staphylococcus hyicus</i> | Pig, skin   |
| No. 4  | <i>Staphylococcus hyicus</i> | Pig, skin   |
| No. 5  | <i>Staphylococcus hyicus</i> | Pig, skin   |
| No. 6  | <i>Staphylococcus hyicus</i> | Pig, joint  |
| No. 7  | <i>Staphylococcus hyicus</i> | Pig         |
| No. 8  | <i>Staphylococcus hyicus</i> | Pig         |
| No. 9  | <i>Staphylococcus hyicus</i> | Pig         |
| No. 10 | <i>Staphylococcus hyicus</i> | Pig         |
| No. 11 | <i>Staphylococcus hyicus</i> | Pig         |
| No. 12 | <i>Staphylococcus hyicus</i> | Pig         |
| No. 13 | <i>Staphylococcus hyicus</i> | Pig         |
| No. 14 | <i>Staphylococcus hyicus</i> | Pig         |
| No. 15 | <i>Staphylococcus hyicus</i> | Pig         |
| No. 16 | <i>Staphylococcus hyicus</i> | Pig         |
| No. 17 | <i>Staphylococcus hyicus</i> | Pig         |
| No. 18 | <i>Staphylococcus hyicus</i> | Pig         |
| No. 19 | <i>Staphylococcus hyicus</i> | Pig         |
| <hr/>  |                              |             |

**Supplementary Table 1. All clinical isolates and reference strains.**

All animal isolates and all human isolates are provided from Dr. Hung-Chih Kuo's laboratory and Dr. Chih-Ho Lai's laboratory, respectively.
